# Supplementary material
Source: PubMed Central journal article supplement (PMC3318626)
Supplement: supp_86.8.4463_FigS1-S2_TableS1-S3.pdf [file supp_86.8.4463_FigS1-S2_TableS1-S3.pdf]

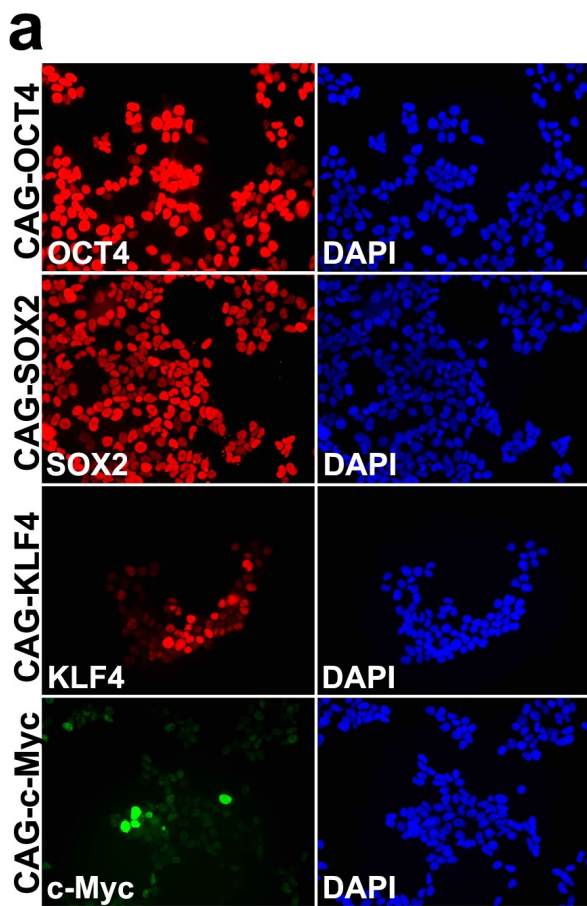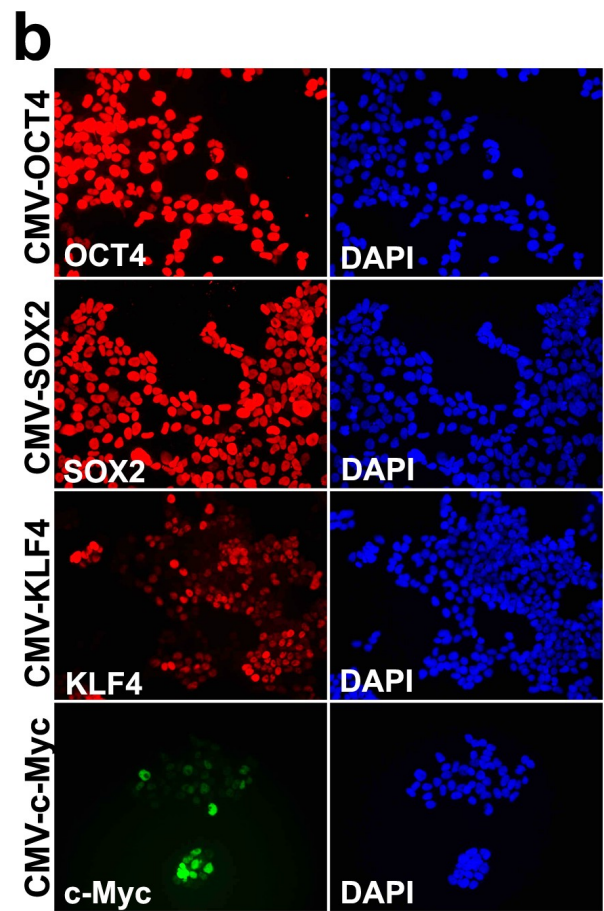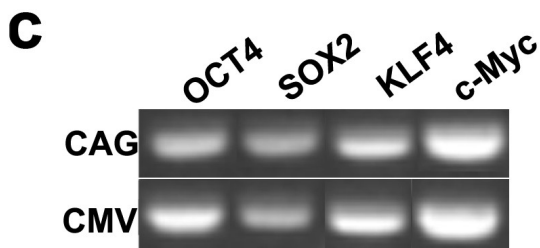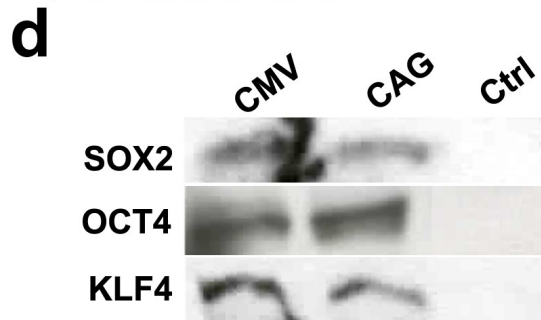

### Supplementary Figure 1: Functionality of AAV viruses

a) Immunocytochemical staining of 293T cells infected with AAV2-CAG reprogramming factors. b) Immunocytochemical staining of 293T cells infected with AAV2-CMV reprogramming factors. Right DAPI staining and left are staining for SOX2, OCT4, KLF4 and c-Myc. c) Western blot of AAV2 transduced 293T cells shows correct sized bands for SOX2, OCT4 and KLF4. d) RT-PCR from AAV2 infected 293T cells shows expression of OCT4, SOX2, KLF4 and c-myc on mRNA level.

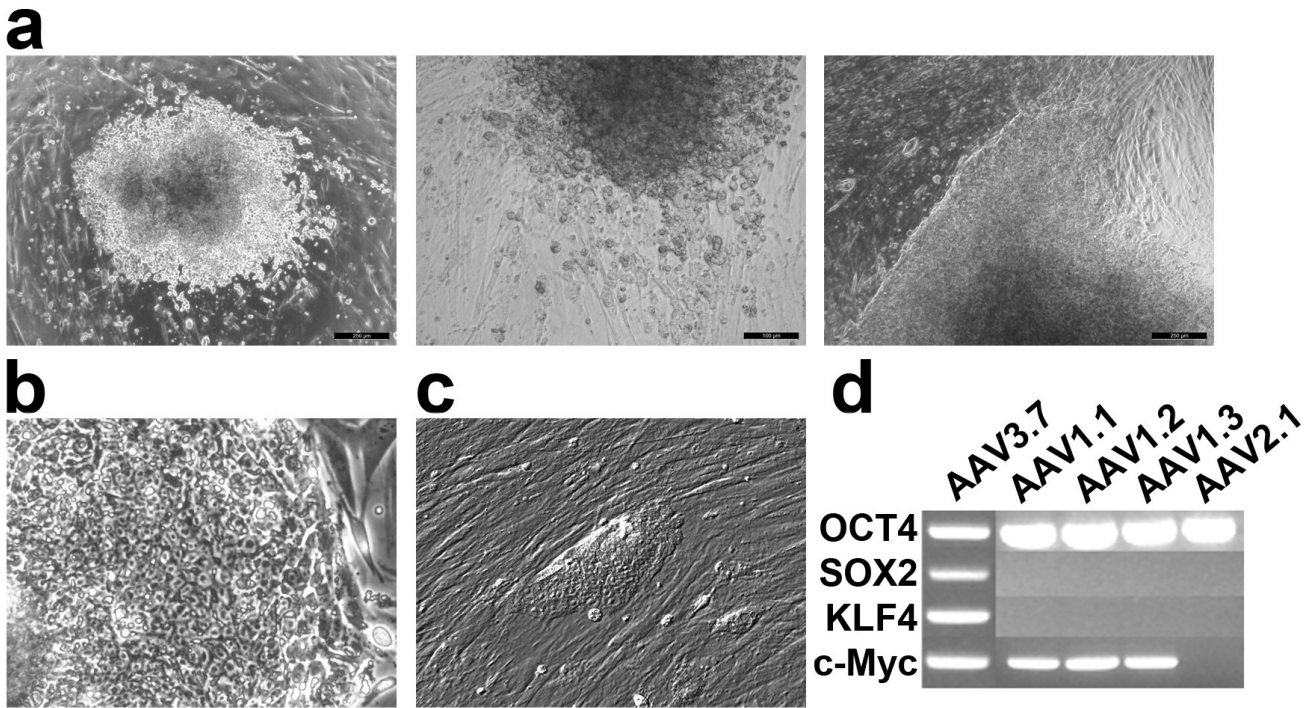

**Supplementary Figure 2: AAV2 induced human colonies**

a) Typical human colonies induced by AAV2 on day 21 of reprogramming. b) Early AAV2 induced human colony on day 13 of reprogramming. c) Passage 1 colony showing morphological resemblance to human pluripotent stem cells. d) RT-PCR analysis of transgene expression from five propagated human colonies shows retained expression of all or some of the reprogramming factors. Bars in a) are 250  $\mu\text{m}$ , 100  $\mu\text{m}$  and 250  $\mu\text{m}$ .

**Supplementary table 1.** Summary of reprogramming experiments with human cells

| Cells | Passage | AAV2 vector | Medium/ Matrix | #No of Trans- ductions | Virus genomes/cell / factor | Colony forming efficiency [%] | Clones expanded |
|-------|---------|-------------|----------------|------------------------|-----------------------------|-------------------------------|-----------------|
| HFF   | 11      | CAG OSKM    | hES/MEFs       | 1                      | 100000                      | 0,001                         | 2               |
|       |         | CAG OSKM    | hES/MEFs       | 1                      | 100000                      | 0,003                         |                 |
|       |         | CAG OSKM    | hES/MEFs       | 2                      | 100000                      | 0,005                         |                 |
|       |         | CAG OSKM    | hES/MEFs       | 2                      | 100000                      | 0,002                         |                 |
|       |         | CAG OSKM    | hES/MEFs       | 3                      | 100000                      | 0,003                         |                 |
|       |         | CAG OSKM    | hES/MEFs       | 3                      | 100000                      | 0                             |                 |
|       |         | CMV OSKM    | hES/MEFs       | 1                      | 100000                      | 0,001                         |                 |
|       |         | CMV OSKM    | hES/MEFs       | 1                      | 100000                      | 0                             |                 |
|       |         | CMV OSKM    | hES/MEFs       | 2                      | 100000                      | 0                             |                 |
|       |         | CMV OSKM    | hES/MEFs       | 2                      | 100000                      | 0,001                         |                 |
|       |         | CMV OSKM    | hES/MEFs       | 3                      | 100000                      | 0                             |                 |
|       |         | CMV OSKM    | hES/MEFs       | 3                      | 100000                      | 0,001                         |                 |
| HFF   | 11      | CAG OSKM    | hES/MEFs       | 4                      | 15000                       | 0,004                         | 1               |
|       |         | CAG OSKM    | hES/MEFs       | 4                      | 30000                       | 0,006                         |                 |
|       |         | CAG OSKM    | hES/MEFs       | 4                      | 60000                       | 0                             |                 |
|       |         | CMV OSKM    | hES/MEFs       | 4                      | 15000                       | 0,001                         |                 |
|       |         | CMV OSKM    | hES/MEFs       | 4                      | 30000                       | 0                             |                 |
|       |         | CMV OSKM    | hES/MEFs       | 4                      | 60000                       | 0,002                         |                 |
| AF    | 7       | CAG OSKM    | hES/MEFs       | 2                      | 100000                      | 0,015                         |                 |
|       |         | CAG OSKM    | hES/MEFs       | 4                      | 30000                       | 0,003                         |                 |
|       |         | CMV OSKM    | hES/MEFs       | 2                      | 100000                      | 0                             |                 |
|       |         | CMV OSKM    | hES/MEFs       | 4                      | 30000                       | 0                             |                 |
| HFF   | 13      | CAG OSKM    | hES/MEFs       | 2                      | 100000                      | 0,006                         | 1               |
|       |         | CAG OSKM    | hES/MEFs       | 4                      | 30000                       | 0                             |                 |
|       |         | CAG OSKM    | hES/Matrigel   | 2                      | 100000                      | 0                             |                 |
|       |         | CAG OSKM    | hES/Matrigel   | 4                      | 30000                       | 0,003                         |                 |
|       |         | CMV OSKM    | hES/MEFs       | 2                      | 100000                      | 0,002                         |                 |
|       |         | CMV OSKM    | hES/MEFs       | 4                      | 30000                       | 0                             |                 |
|       |         | CMV OSKM    | hES/Matrigel   | 2                      | 100000                      | 0,001                         |                 |
|       |         | CMV OSKM    | hES/Matrigel   | 4                      | 30000                       | 0,002                         |                 |
| HFF   | 10      | CMV OSKM    | hES/MEFs       | 1                      | 20                          | 0                             |                 |
|       |         | CMV OSKM    | hES/MEFs       | 1                      | 200                         | 0,001                         |                 |
|       |         | CMV OSKM    | hES/MEFs       | 1                      | 2000                        | 0,005                         |                 |
|       |         | CMV OSKM    | hES/MEFs       | 1                      | 20000                       | 0,003                         |                 |
|       |         | CMV OSKM    | hES/MEFs       | 2                      | 20                          | 0                             |                 |
|       |         | CMV OSKM    | hES/MEFs       | 2                      | 200                         | 0,002                         |                 |
|       |         | CMV OSKM    | hES/MEFs       | 2                      | 2000                        | 0,004                         |                 |
|       |         | CMV OSKM    | hES/MEFs       | 2                      | 20000                       | 0                             |                 |
|       |         | CAG OSKM    | hES/MEFs       | 1                      | 20                          | 0                             |                 |
|       |         | CAG OSKM    | hES/MEFs       | 1                      | 200                         | 0,022                         |                 |
|       |         | CAG OSKM    | hES/MEFs       | 1                      | 2000                        | 0,019                         |                 |
|       |         | CAG OSKM    | hES/MEFs       | 1                      | 20000                       | 0,036                         |                 |
|       |         | CAG OSKM    | hES/MEFs       | 2                      | 20                          | 0                             |                 |
|       |         | CAG OSKM    | hES/MEFs       | 2                      | 200                         | 0,024                         |                 |
|       |         | CAG OSKM    | hES/MEFs       | 2                      | 2000                        | 0,015                         |                 |
|       |         | CAG OSKM    | hES/MEFs       | 2                      | 20000                       | 0,029                         |                 |

|     |    |          |                            |   |       |       |   |
|-----|----|----------|----------------------------|---|-------|-------|---|
| HFF | 10 | CAG OSKM | hES/MEFs                   | 1 | 20000 | 0,065 |   |
|     |    | CAG OSKM | CM/Matrigel                | 1 | 20000 | 0,035 |   |
|     |    | CAG OSKM | hES/MEFs                   | 2 | 20000 | 0,007 |   |
|     |    | CAG OSKM | CM/Matrigel                | 2 | 20000 | 0,003 |   |
|     |    | CAG OSKM | hES/MEFs                   | 2 | 20000 | 0,045 |   |
|     |    | CAG OSKM | CM/Matrigel                | 2 | 20000 | 0,021 |   |
|     |    | CAG OSKM | hES/MEFs                   | 1 | 20000 | 0,012 |   |
|     |    | CAG OSKM | CM/Matrigel                | 1 | 20000 | 0,016 |   |
|     |    | CAG OSKM | hES/MEFs                   | 2 | 20000 | 0,014 | 2 |
|     |    | CAG OSKM | CM/Matrigel                | 2 | 20000 | 0,005 |   |
|     |    | CAG OSKM | hES/MEFs                   | 2 | 20000 | 0,03  | 4 |
|     |    | CAG OSKM | CM/Matrigel                | 2 | 20000 | 0,014 | 1 |
| HFF | 9  | CAG OSKM | hES+PD+SB /<br>Matrigel    | 2 | 20000 | 0,006 |   |
|     |    | CAG OSKM | hES+PD+SB /<br>Matrigel    | 2 | 20000 | 0,002 |   |
|     |    | CAG OSKM | hES+PD+SB<br>+VPA/Matrigel | 2 | 20000 | 0,019 |   |
|     |    | CAG OSKM | hES+PD+SB<br>+VPA/Matrigel | 2 | 20000 | 0,003 |   |
|     |    | CAG OSKM | hES +<br>NaB/MEFs          | 1 | 20000 | 0,003 |   |
|     |    | CAG OSKM | hES +<br>NaB/MEFs          | 1 | 20000 | 0,001 |   |
| HFF | 7  | CAG OSKM | hES/MEFs                   | 2 | 20000 | 0,011 |   |
|     |    | CAG OSKM | hES/MEFs                   | 2 | 20000 | 0,011 |   |
|     |    | CAG OSKM | hES+NaB/MEF<br>s           | 2 | 20000 | 0,008 |   |
|     |    | CAG OSKM | hES/MEFs                   | 4 | 20000 | 0,015 |   |
|     |    | CAG OSKM | hES+NaB/MEF<br>s           | 4 | 20000 | 0,01  |   |
|     |    | CAG OSKM | hES+PD+SB<br>+NaB/Matrigel | 2 | 20000 | 0,002 |   |
|     |    | CAG OSKM | hES+PD+SB<br>+NaB/Matrigel | 2 | 20000 | 0,005 | 1 |

**Supplementary table 2.** Summary of reprogramming experiments with mouse cells

| Cells | Passage  | AAV2 vector | Medium | #No of Trans-<br>ductions | Virus<br>genomes/<br>cell/factor | Colony<br>forming<br>efficiency [%] | clones<br>expanded |
|-------|----------|-------------|--------|---------------------------|----------------------------------|-------------------------------------|--------------------|
| ICR   | 1        | CMV OSKM    | mES    | 1                         | 20000                            | 0,001                               | 0                  |
|       |          | CMV OSKM    | mES    | 2                         | 20000                            | 0,005                               | 0                  |
|       |          | CMV OSKM    | mES    | 3                         | 20000                            | 0,001                               | 0                  |
|       |          | CMV OSKM    | mES    | 2                         | 20000                            | 0,003                               | 0                  |
|       |          | CMV OSKM    | mES    | 3                         | 20000                            | 0,006                               | 0                  |
|       |          | CMV OSKM    | mES    | 3                         | 20000                            | 0,001                               | 0                  |
|       | CAG OSKM | mES         | 1      | 20000                     | 0,04                             | 1                                   |                    |
|       |          | mES         | 2      | 20000                     | 0,033                            | 3                                   |                    |
|       |          | mES         | 3      | 20000                     | 0,022                            | 1                                   |                    |
|       |          | mES         | 2      | 20000                     | 0,091                            | 1                                   |                    |
|       |          | mES         | 3      | 20000                     | 0,048                            | 2                                   |                    |
|       |          | mES         | 3      | 20000                     | 0,042                            | 2                                   |                    |
| ICR   | 1        | CAG OSKM    | mES    | 1                         | 200000                           | 0,072                               | 12                 |
|       |          | CAG OSKM    | mES    | 1                         | 20000                            | 0,009                               | 2                  |
|       |          | CAG OSKM    | mES    | 1                         | 2000                             | 0                                   | 0                  |
|       |          | CAG OSKM    | mES    | 1                         | 200                              | 0                                   | 0                  |
|       |          | CAG OSKM    | mES    | 2                         | 20000                            | 0                                   | 0                  |
|       |          | CAG OSKM    | mES    | 2                         | 2000                             | 0                                   | 0                  |
|       |          | CAG OSKM    | mES    | 2                         | 200                              | 0                                   | 0                  |
|       |          | CAG OSKM    | mES    | 2                         | 200                              | 0                                   | 0                  |
| ICR   | 2        | CAG OSKM    | mES    | 1                         | 20000                            | 0,003                               | 0                  |
|       |          | CAG OSKM    | mES    | 1                         | 2000                             | 0                                   | 0                  |
|       |          | CAG OSKM    | mES    | 1                         | 200                              | 0                                   | 0                  |
|       |          | CAG OSKM    | mES    | 2                         | 20000                            | 0,015                               | 0                  |
|       |          | CAG OSKM    | mES    | 2                         | 2000                             | 0                                   | 0                  |
|       |          | CAG OSKM    | mES    | 2                         | 200                              | 0                                   | 0                  |
|       | CAG OSKM | mES+NaB     | 1      | 20000                     | 0,006                            | 0                                   |                    |
|       |          | mES+NaB     | 1      | 2000                      | 0                                | 0                                   |                    |
|       |          | mES+NaB     | 1      | 200                       | 0                                | 0                                   |                    |
|       |          | mES+NaB     | 2      | 20000                     | 0,006                            | 0                                   |                    |
|       |          | mES+NaB     | 2      | 2000                      | 0                                | 0                                   |                    |
|       |          | mES+NaB     | 2      | 200                       | 0                                | 0                                   |                    |

**Supplementary table 3** PCR primers used

| <b>Primer</b> | <b>Forward</b>        | <b>Reverse</b>          | <b>Reference</b>       |
|---------------|-----------------------|-------------------------|------------------------|
| Oct4 endo     | TTGGGCTAGAGAAGGATGTG  | GAGTAGAGTGTGGTGAAGTG    |                        |
| Sox2 endo     | GAAACGACAGCTGCGGAAA   | TCTAGTCGGCATCACGGTTTT   | Gonzalez et al. 2009   |
| Klf4 endo     | AACATGCCCGGACTTACAAA  | TTCAAGGGAATCCTGGTCTTC   | Stadtfeldt et al. 2008 |
| c-myc endo    | TAACTCGAGGAGGAGCTGGA  | GCCAAGGTTGTGAGGTTAGG    | Stadtfeldt et al. 2008 |
| Nanog         | CTCAGCCTCCAGCAGATGC   | GGGATAGCTGCAATGGATGC    |                        |
| Rex1          | TGTCCTCAGGCTGGGTAGTC  | TGATTTTCCGACGTATGCAA    | Gonzalez et al. 2009   |
| Oct4 exo      | TCCCCCTGTCTCCGTCACCAC | GCGGCCCAAAGGGAGATCCG    |                        |
| Sox2 exo      | CCTACTCGCAGCAGGGCACC  | GCGGCCCAAAGGGAGATCCG    |                        |
| Klf4 exo      | TAAACACACGGGGCACC GCC | GCGGCCCAAAGGGAGATCCG    |                        |
| C-myc exo     | AAACGACAAGAGGGCGGACAC | GCGGCCCAAAGGGAGATCCG    |                        |
| WPRE          | TGAGTTTGGACAAACCACAAC | TTGTTGTTAACTTGTATTGCAGC |                        |
